# Supplementary material
Source: HighWire-hosted journal article supplement (https://gh.bmj.com/content/9/8/e014379)
Supplement: inline-supplementary-material-1 [file inline-supplementary-material-1.pdf]

Supplemental Table S1: Detailed search strategies for the electronic databases

| Database | Query                                                                                                                                                                                                                                                                                                                                        | Records retrieved |
|----------|----------------------------------------------------------------------------------------------------------------------------------------------------------------------------------------------------------------------------------------------------------------------------------------------------------------------------------------------|-------------------|
| MEDLINE  | <b>Ovid MEDLINE(R) and In-Process, In-Data-Review &amp; Other Non-Indexed Citations &lt;1946 to September 27, 2021&gt;</b>                                                                                                                                                                                                                   |                   |
|          | 1 Disease Outbreaks/                                                                                                                                                                                                                                                                                                                         | 85271             |
|          | 2 epidemics/ or pandemics/                                                                                                                                                                                                                                                                                                                   | 77571             |
|          | 3 (catastrophe or disaster or drought or earthquake or evacuation or famine or flood or floods or hurricane or cyclone or landslide or landslide or tsunami or tidal wave or volcano).tw.                                                                                                                                                    | 95527             |
|          | 4 Natural Disasters/                                                                                                                                                                                                                                                                                                                         | 348               |
|          | 5 Public health emergency.mp.                                                                                                                                                                                                                                                                                                                | 2882              |
|          | 6 COVID-19/                                                                                                                                                                                                                                                                                                                                  | 105511            |
|          | 7 Covid.tw.                                                                                                                                                                                                                                                                                                                                  | 132306            |
|          | 8 Hemorrhagic Fever, Ebola/                                                                                                                                                                                                                                                                                                                  | 6009              |
|          | 9 Ebola virus.mp. or Ebolavirus/                                                                                                                                                                                                                                                                                                             | 6362              |
|          | 10 SARS Virus/ or SARS-CoV-2/ or SARS.mp.                                                                                                                                                                                                                                                                                                    | 113897            |
|          | 11 yellow fever.tw. or Yellow Fever/                                                                                                                                                                                                                                                                                                         | 7064              |
|          | 12 Influenza, Human/                                                                                                                                                                                                                                                                                                                         | 52855             |
|          | 13 Communicable Diseases, Emerging/                                                                                                                                                                                                                                                                                                          | 6305              |
|          | 14 emerging virus.mp.                                                                                                                                                                                                                                                                                                                        | 1360              |
|          | 15 1 or 2 or 3 or 4 or 5 or 6 or 7 or 8 or 9 or 10 or 11 or 12 or 13 or 14                                                                                                                                                                                                                                                                   | 407332            |
|          | 16 Disaster Planning/ or preparedness.tw.                                                                                                                                                                                                                                                                                                    | 27006             |
|          | 17 readiness.tw.                                                                                                                                                                                                                                                                                                                             | 17895             |
|          | 18 risk assessment.tw. or Risk Assessment/                                                                                                                                                                                                                                                                                                   | 322294            |
|          | 19 Disaster Medicine/ or "Emergency Medical Services"/                                                                                                                                                                                                                                                                                       | 33078             |
|          | 20 public health response.mp.                                                                                                                                                                                                                                                                                                                | 1632              |
|          | 21 emergency planning.mp.                                                                                                                                                                                                                                                                                                                    | 501               |
|          | 22 disaster management.mp.                                                                                                                                                                                                                                                                                                                   | 1370              |
|          | 23 operational readiness.mp.                                                                                                                                                                                                                                                                                                                 | 169               |
|          | 24 Leadership/                                                                                                                                                                                                                                                                                                                               | 43759             |
|          | 25 governance.tw.                                                                                                                                                                                                                                                                                                                            | 14287             |
|          | 26 Incident Management System.mp.                                                                                                                                                                                                                                                                                                            | 111               |
|          | 27 Emergency Operations Centre.mp.                                                                                                                                                                                                                                                                                                           | 27                |
|          | 28 multi-sector coordination.mp.                                                                                                                                                                                                                                                                                                             | 3                 |
|          | 29 Country Risk Profile.mp.                                                                                                                                                                                                                                                                                                                  | 0                 |
|          | 30 Operational planning.mp.                                                                                                                                                                                                                                                                                                                  | 174               |
|          | 31 ("emergency response plan" or "contingency plan").mp. [mp=title, abstract, original title, name of substance word, subject heading word, floating sub-heading word, keyword heading word, organism supplementary concept word, protocol supplementary concept word, rare disease supplementary concept word, unique identifier, synonyms] | 1177              |
|          | 32 (logistics and supply chain).mp. [mp=title, abstract, original title, name of substance word, subject heading word, floating sub-heading word, keyword heading word, organism supplementary concept word, protocol supplementary concept word, rare disease supplementary concept word, unique identifier, synonyms]                      | 267               |

|               |                                            |                                                                                                                                                                                         |        |
|---------------|--------------------------------------------|-----------------------------------------------------------------------------------------------------------------------------------------------------------------------------------------|--------|
|               | 33                                         | Contingency finance.mp.                                                                                                                                                                 | 0      |
|               | 34                                         | Drugs, Essential/ or essential medicine.mp.                                                                                                                                             | 1977   |
|               | 35                                         | logistic supply.mp.                                                                                                                                                                     | 7      |
|               | 36                                         | early warning.mp.                                                                                                                                                                       | 7531   |
|               | 37                                         | Public Health Surveillance/                                                                                                                                                             | 4719   |
|               | 38                                         | community resilience.mp.                                                                                                                                                                | 561    |
|               | 39                                         | 16 or 17 or 18 or 19 or 20 or 21 or 22 or 23 or 24 or 25 or 26 or 27 or 28 or 29 or 30 or 31 or 32 or 33 or 34 or 35 or 36 or 37 or 38                                                  | 466764 |
|               | 40                                         | 15 and 39                                                                                                                                                                               | 29015  |
|               | 41                                         | health system.mp.                                                                                                                                                                       | 61652  |
|               | 42                                         | health services.tw. or Health Services/                                                                                                                                                 | 95945  |
|               | 43                                         | Public Health/                                                                                                                                                                          | 87343  |
|               | 44                                         | health facilities.mp. or Health Facilities/                                                                                                                                             | 29065  |
|               | 45                                         | health personnel.mp. or exp Health Personnel/                                                                                                                                           | 625414 |
|               | 46                                         | 41 or 42 or 43 or 44 or 45                                                                                                                                                              | 857447 |
|               | 47                                         | 40 and 46                                                                                                                                                                               | 5815   |
|               | 48                                         | limit 47 to yr="2010 -Current"                                                                                                                                                          | 4275   |
| <b>Embase</b> | <b>Embase &lt;1996 to 2021 Week 38&gt;</b> |                                                                                                                                                                                         |        |
|               | 1                                          | Disease Outbreak.tw.                                                                                                                                                                    | 7421   |
|               | 2                                          | epidemic/ or pandemic/                                                                                                                                                                  | 187037 |
|               | 3                                          | (catastrophe or disaster or drought or earthquake or evacuation or famine or flood or floods or hurricane or cyclone or landslide or landslide or tsunami or tidal wave or volcano).tw. | 96165  |
|               | 4                                          | Public health emergency.mp.                                                                                                                                                             | 3299   |
|               | 5                                          | natural disaster/                                                                                                                                                                       | 3548   |
|               | 6                                          | Covid.tw.                                                                                                                                                                               | 157374 |
|               | 7                                          | coronavirus disease 2019/                                                                                                                                                               | 148801 |
|               | 8                                          | Ebola hemorrhagic fever/                                                                                                                                                                | 6883   |
|               | 9                                          | Ebolavirus/                                                                                                                                                                             | 3761   |
|               | 10                                         | SARS.mp. or severe acute respiratory syndrome/                                                                                                                                          | 80752  |
|               | 11                                         | yellow fever/                                                                                                                                                                           | 3932   |
|               | 12                                         | influenza/                                                                                                                                                                              | 25733  |
|               | 13                                         | Communicable Diseases, Emerging/                                                                                                                                                        | 12560  |
|               | 14                                         | 1 or 2 or 3 or 4 or 5 or 6 or 7 or 8 or 9 or 10 or 11 or 12 or 13                                                                                                                       | 442828 |
|               | 15                                         | Disaster Planning/ or preparedness.tw.                                                                                                                                                  | 26939  |
|               | 16                                         | readiness.tw.                                                                                                                                                                           | 21708  |
|               | 17                                         | risk assessment.tw. or Risk Assessment/                                                                                                                                                 | 630413 |
|               | 18                                         | public health response.mp.                                                                                                                                                              | 1779   |
|               | 19                                         | emergency planning.mp.                                                                                                                                                                  | 656    |
|               | 20                                         | disaster management.mp.                                                                                                                                                                 | 1674   |
|               | 21                                         | operational readiness.mp.                                                                                                                                                               | 202    |
|               | 22                                         | Leadership/                                                                                                                                                                             | 70482  |
|               | 23                                         | governance.tw.                                                                                                                                                                          | 18071  |
|               | 24                                         | Incident Management System.mp.                                                                                                                                                          | 154    |
|               | 25                                         | Emergency Operations Centre.mp.                                                                                                                                                         | 36     |
|               | 26                                         | multi-sector coordination.mp.                                                                                                                                                           | 6      |
|               | 27                                         | Country Risk Profile.mp.                                                                                                                                                                | 0      |
|               | 28                                         | Operational planning.mp.                                                                                                                                                                | 204    |
|               | 29                                         | ("emergency response plan" or "contingency plan").mp.                                                                                                                                   | 1478   |
|               | 30                                         | (logistics and supply chain).mp.                                                                                                                                                        | 417    |

|                       |                                                                                            |                                                                                                                                                                                                                                                                                                                                                   |        |
|-----------------------|--------------------------------------------------------------------------------------------|---------------------------------------------------------------------------------------------------------------------------------------------------------------------------------------------------------------------------------------------------------------------------------------------------------------------------------------------------|--------|
|                       | 31                                                                                         | Contingency finance.mp.                                                                                                                                                                                                                                                                                                                           | 0      |
|                       | 32                                                                                         | logistic supply.mp.                                                                                                                                                                                                                                                                                                                               | 19     |
|                       | 33                                                                                         | early warning.mp.                                                                                                                                                                                                                                                                                                                                 | 9804   |
|                       | 34                                                                                         | Public Health Surveillance.tw.                                                                                                                                                                                                                                                                                                                    | 2351   |
|                       | 35                                                                                         | community resilience.mp.                                                                                                                                                                                                                                                                                                                          | 576    |
|                       | 36                                                                                         | health system.mp.                                                                                                                                                                                                                                                                                                                                 | 81325  |
|                       | 37                                                                                         | health services.tw. or Health Service/                                                                                                                                                                                                                                                                                                            | 196744 |
|                       | 38                                                                                         | Public Health/                                                                                                                                                                                                                                                                                                                                    | 177806 |
|                       | 39                                                                                         | emergency health service/                                                                                                                                                                                                                                                                                                                         | 91713  |
|                       | 40                                                                                         | disaster medicine/                                                                                                                                                                                                                                                                                                                                | 1419   |
|                       | 41                                                                                         | essential drug/                                                                                                                                                                                                                                                                                                                                   | 1412   |
|                       | 42                                                                                         | essential medicine.tw.                                                                                                                                                                                                                                                                                                                            | 2275   |
|                       | 43                                                                                         | 15 or 16 or 17 or 18 or 19 or 20 or 21 or 22 or 23 or 24 or 25 or 26 or 27 or 28 or 29 or 30 or 31 or 32 or 33 or 34 or 35 or 36 or 37 or 38 or 39 or 40 or 41 or 42                                                                                                                                                                              | 860867 |
|                       | 44                                                                                         | 14 and 43                                                                                                                                                                                                                                                                                                                                         | 42998  |
|                       | 45                                                                                         | health care facility/                                                                                                                                                                                                                                                                                                                             | 62270  |
|                       | 46                                                                                         | health personnel.mp. or health care personnel/                                                                                                                                                                                                                                                                                                    | 247442 |
|                       | 47                                                                                         | 28 or 29 or 30 or 46 or 47                                                                                                                                                                                                                                                                                                                        | 688599 |
|                       | 48                                                                                         | 44 and 47                                                                                                                                                                                                                                                                                                                                         | 9874   |
|                       | 49                                                                                         | limit 48 to yr="2010 -Current"                                                                                                                                                                                                                                                                                                                    | 7852   |
|                       | 50                                                                                         | limit 49 to exclude medline journals                                                                                                                                                                                                                                                                                                              | 1076   |
| <b>Web of Science</b> | <b>Science Citation index expanded and Social Sciences citation index (Web of Science)</b> |                                                                                                                                                                                                                                                                                                                                                   |        |
|                       | 1                                                                                          | epidemic or pandemic or "natural disaster" or earthquake or evacuation or famine or flood or floods or hurricane or cyclone or landslide or landslide or tsunami or Covid-19 or Ebola or "yellow fever" or "human influenza" or "emerging diseases" (Topic)                                                                                       | 617867 |
|                       | 2                                                                                          | preparedness or readiness or "risk assessment" or "Emergency Medical Services" or "public health response" or "emergency planning" or "disaster management" (Topic) or Leadership or governance or "Incident Management System" or "Emergency Operations " (Topic) or logistics or "supply chain" or "essential drugs" or "early warning" (Topic) | 813269 |
|                       | 3                                                                                          | (#2) AND #1                                                                                                                                                                                                                                                                                                                                       | 38333  |
|                       | 4                                                                                          | (#2) AND #1 and 2022 or 2021 or 2020 or 2019 or 2018 or 2017 or 2016 or 2015 or 2014 or 2013 or 2012 or 2011 or 2010 (Publication Years)                                                                                                                                                                                                          | 33618  |
|                       | 5                                                                                          | ((#2) AND #1) AND TS=("health system" or "health services" or "health facilities" or "health personnel")                                                                                                                                                                                                                                          | 1624   |
|                       | 6                                                                                          | ((#2) AND #1) AND TS=("health system" or "health services" or "health facilities" or "health personnel") and 2022 or 2021 or 2020 or 2019 or 2018 or 2017 or 2016 or 2015 or 2014 or 2013 or 2012 or 2011 or 2010 (Publication Years)                                                                                                             | 1476   |
