# Supplementary material
Source: HighWire-hosted journal article supplement (https://gh.bmj.com/content/9/8/e014379)
Supplement: inline-supplementary-material-5 [file inline-supplementary-material-5.pdf]

Supplemental Table S2: Study characteristics and readiness/preparedness definitions

| Author(s) & publication year | Level (community, national, etc.) | Type of emergency               | Preparedness definition<br>Readiness definition                                                                                                                                                                                                                                                                                       | Key actors                                                                                                                                                                                                 |
|------------------------------|-----------------------------------|---------------------------------|---------------------------------------------------------------------------------------------------------------------------------------------------------------------------------------------------------------------------------------------------------------------------------------------------------------------------------------|------------------------------------------------------------------------------------------------------------------------------------------------------------------------------------------------------------|
| PRIMARY STUDIES              |                                   |                                 |                                                                                                                                                                                                                                                                                                                                       |                                                                                                                                                                                                            |
| Aceng et al. 2020 (19)       | National and health facility      | Ebola virus disease (EVD)       | The epidemic preparedness process constituted all the activities that were undertaken by Ministry of Health and its partners from national to health facility levels to enable readiness to effective response to EVD outbreak in Uganda from August 2018 when EVD outbreak was declared in the DRC to the time of writing.           | Ministry of Health, Public Health Emergency Operations Centre (PHEOC) personnel and the National Task Force (NTF) for public health emergencies                                                            |
| Bennett 2021 (51)            | National and state public health  | COVID-19                        | Not mentioned.                                                                                                                                                                                                                                                                                                                        | Australian Health Protection Principal Committee (AHPPC): the Communicable Disease Network of Australia (CDNA), the Public Health Laboratory Network (PHLN), and the Infection Control Expert Group (ICEG) |
| Espinal et al. 2016 (75)     | National                          | Ebola virus disease (EVD)       | Not mentioned.                                                                                                                                                                                                                                                                                                                        | The Pan American Health Organisation (PAHO) and partner agencies                                                                                                                                           |
| Khan et al. 2018 (22)        | Local/ regional                   | Not specified†                  | Used the WHO definition of emergency preparedness: ‘...the knowledge and capacities and organisational systems developed by governments, response and recovery organisations, communities and individuals to effectively anticipate, respond to, and recover from the impacts of likely, imminent, emerging, or current emergencies’. | Local/ regional public health agencies                                                                                                                                                                     |
| Khan et al. 2019 (28)        | Local/ regional                   | Not specified†                  | Not mentioned.                                                                                                                                                                                                                                                                                                                        | Local/ regional public health agencies                                                                                                                                                                     |
| Lee 2013 (20)                | National                          | Pandemic influenza              | Preparedness is a series of activities in planning, preparation, education, and training to enhance the capabilities of public health personnel.                                                                                                                                                                                      | Division of public health crisis response in Korea Centers for Disease Control and Prevention                                                                                                              |
| Liu & Saltman 2020 (66)      | National                          | COVID-19                        | Not mentioned.                                                                                                                                                                                                                                                                                                                        | Chinese government: central, provincial, and municipal.                                                                                                                                                    |
| Malik et al. 2013 (38)       | Regional and national             | Viral haemorrhagic fevers (VHF) | Not mentioned.                                                                                                                                                                                                                                                                                                                        | WHO and public health representatives                                                                                                                                                                      |
| Martin et al. 2010 (82)      | Regional and national             | Influenza H1N1 virus            | Not mentioned.                                                                                                                                                                                                                                                                                                                        | Public health policy makers and pandemic planners (legal experts)                                                                                                                                          |
| Moonasar et al. 2021 (37)    | National                          | COVID-19                        | Not mentioned.                                                                                                                                                                                                                                                                                                                        | Ministry of Health, national and provincial Incident Management Teams                                                                                                                                      |
| Nanziri et al. 2020 (89)     | District                          | Ebola virus disease (EVD)       | Not mentioned.                                                                                                                                                                                                                                                                                                                        | Ministry of Health, public health emergency management personnel and the National Task Force                                                                                                               |
| Neupane et al. 2020 (87)     | National                          | COVID-19                        | Not mentioned.                                                                                                                                                                                                                                                                                                                        | Ministry of Health and Population (MoHP)                                                                                                                                                                   |
| Nguyen et al. 2021 (71)      | National                          | COVID-19                        | Not mentioned.                                                                                                                                                                                                                                                                                                                        | Government, Ministry of Health, health systems and media                                                                                                                                                   |

|                                  |                       |                              |                |                                                                                                                                                                                                                                                                                                          |
|----------------------------------|-----------------------|------------------------------|----------------|----------------------------------------------------------------------------------------------------------------------------------------------------------------------------------------------------------------------------------------------------------------------------------------------------------|
| Nsubuga et al. 2021 (83)         | National and district | Ebola virus disease (EVD)    | Not mentioned. | Ministry of Health, the national and district task force, and village health teams                                                                                                                                                                                                                       |
| Nyenswah et al. 2016 (32)        | National              | Ebola virus disease (EVD)    | Not mentioned. | Ministry of Health and Social Welfare (MOHSW)                                                                                                                                                                                                                                                            |
| Oh et al. 2020 (36)              | National              | COVID-19                     | Not mentioned. | The Ministry of Health and Welfare and the President's Office                                                                                                                                                                                                                                            |
| Oliveira et al. 2020 (79)        | National              | COVID-19                     | Not mentioned. | The Ministry of Health                                                                                                                                                                                                                                                                                   |
| Otu et al. 2018 (90)             | National              | Ebola virus disease (EVD)    | Not mentioned. | Lagos State Government in conjunction with the Federal Ministry of Health                                                                                                                                                                                                                                |
| Paudyal et al. 2021 (65)         | Clinical services     | COVID-19                     | Not mentioned. | Clinical pharmacists                                                                                                                                                                                                                                                                                     |
| Stoto et al. 2013 (85)           | National and local    | 2009 H1N1 influenza pandemic | Not mentioned. | State and local public health officials                                                                                                                                                                                                                                                                  |
| Swaan et al. 2018 (88)           | Regional and national | Ebola virus disease (EVD)    | Not mentioned. | Centre for Infectious Disease Control (CID) of the National Institute for Public Health and the Environment (RIVM) coordinates response on a national level on behalf of the Ministry of Health. Public health services (PHSs) coordinate preparedness and response regionally.                          |
| Tay et al. 2010 (33)             | National              | Influenza A (H1N1-2009)      | Not mentioned. | Ministry of Health and National Task Force                                                                                                                                                                                                                                                               |
| Tran et al. 2020 (77)            | Community             | COVID-19                     | Not mentioned. | District health system policy makers and practitioners                                                                                                                                                                                                                                                   |
| Wan et al. 2014 (53)             | National              | Ebola virus disease (EVD)    | Not mentioned. | The National Crisis Preparedness and Response Centre (CPRC), which is the national command centre for infectious disease surveillance under the Ministry of Health.                                                                                                                                      |
| <b>SECONDARY STUDIES</b>         |                       |                              |                |                                                                                                                                                                                                                                                                                                          |
| Biswas et al. 2020 (54)          | National              | COVID-19                     | Not mentioned. | Health system policy makers and practitioners                                                                                                                                                                                                                                                            |
| Ghanbari et al. 2020 (41)        | National              | COVID-19                     | N/A            | Ministry of Health                                                                                                                                                                                                                                                                                       |
| GRID Covid Study Group 2020 (31) | National              | COVID-19                     | Not mentioned. | Government of India, state governments and Ministry of Health and Family Welfare (MOHFW).                                                                                                                                                                                                                |
| Hasan et al. 2021 (76)           | Health systems        | COVID-19                     | Not mentioned. | Health system policy makers and practitioners                                                                                                                                                                                                                                                            |
| He et al. 2020 (46)              | Federal               | COVID-19                     | Not mentioned. | National Security Council (NSC), National Crisis Centre (NCCN), Federal Coordination Committee (COFECO), the Ministers-President of the Regions and Communities, FPS Public Health, Risk Assessment Group (RAG), Risk Management Group (RMG), Scientific Committee for Coronavirus, and some other units |

|                               |                                   |                          |                                                                                                                                                                                                                                                                                                                                                                                                                                                                                                                                                                                                    |                                                                                                                                                                                                                                                                                                                                                                                                                                                                                                                                                                                                                                                                                                                                                                                                                                                                                                                                       |
|-------------------------------|-----------------------------------|--------------------------|----------------------------------------------------------------------------------------------------------------------------------------------------------------------------------------------------------------------------------------------------------------------------------------------------------------------------------------------------------------------------------------------------------------------------------------------------------------------------------------------------------------------------------------------------------------------------------------------------|---------------------------------------------------------------------------------------------------------------------------------------------------------------------------------------------------------------------------------------------------------------------------------------------------------------------------------------------------------------------------------------------------------------------------------------------------------------------------------------------------------------------------------------------------------------------------------------------------------------------------------------------------------------------------------------------------------------------------------------------------------------------------------------------------------------------------------------------------------------------------------------------------------------------------------------|
| Itzwerth et al. 2018 (57)     | National, state, and territorial. | Influenza                | Not mentioned.                                                                                                                                                                                                                                                                                                                                                                                                                                                                                                                                                                                     | Pandemic planners                                                                                                                                                                                                                                                                                                                                                                                                                                                                                                                                                                                                                                                                                                                                                                                                                                                                                                                     |
| Kandel et al. 2020 (24)       | National                          | COVID-19                 | Achieving <b>readiness</b> is a continuous process of establishing, strengthening, and maintaining a multisectoral response infrastructure that can be applied at all levels, which follows an all-hazard approach, and which focuses on the highest priority risks. Operational readiness builds on existing capacities to design and set up specialised arrangements and services for an emergency response.                                                                                                                                                                                     | Not mentioned                                                                                                                                                                                                                                                                                                                                                                                                                                                                                                                                                                                                                                                                                                                                                                                                                                                                                                                         |
| Khan et al. 2015 (26)         | National, state/provincial, local | Not specified†           | Public health emergency preparedness has been defined as “the capability of the public health and health care systems, communities, and individuals, to prevent, protect against, quickly respond to, and recover from health emergencies, particularly those whose scale, timing, or unpredictability threatens to overwhelm routine capabilities”. Examples of actions of PHEP related to health emergencies include surveillance and epidemiologic activities to monitor, detect, and investigate potential health threats, and the development and communication of information to the public. | Public health and health systems policy makers and practitioners and communities.                                                                                                                                                                                                                                                                                                                                                                                                                                                                                                                                                                                                                                                                                                                                                                                                                                                     |
| Mohammadpour et al. 2021 (70) | Health systems                    | SARS, MERS, and COVID-19 | Not mentioned.                                                                                                                                                                                                                                                                                                                                                                                                                                                                                                                                                                                     | Government and health system policy makers and practitioners                                                                                                                                                                                                                                                                                                                                                                                                                                                                                                                                                                                                                                                                                                                                                                                                                                                                          |
| Neogi & Preetha 2020 (29)     | Health systems                    | COVID-19                 | Not mentioned.                                                                                                                                                                                                                                                                                                                                                                                                                                                                                                                                                                                     | N/A                                                                                                                                                                                                                                                                                                                                                                                                                                                                                                                                                                                                                                                                                                                                                                                                                                                                                                                                   |
| Petrović et al. 2020 (21)     | National                          | COVID-19                 | <b>Structural readiness:</b> reflects the state in which society awaits the pandemic. It includes three dimensions: health system preparedness, trust in institutions, and health risk factors.<br><br>Preparedness is a country’s capacity to deal with the importation and the spread of the virus.                                                                                                                                                                                                                                                                                              | Government and health system policy makers                                                                                                                                                                                                                                                                                                                                                                                                                                                                                                                                                                                                                                                                                                                                                                                                                                                                                            |
| Raoofi et al. 2020 (48)       | National (health policy)          | COVID-19                 | Not mentioned.                                                                                                                                                                                                                                                                                                                                                                                                                                                                                                                                                                                     | Actors include a wide range of governmental and non- governmental organisations, interest groups, media, religious groups, etc, that influence various stages of the policy process. The Ministry of Health and Medical Education (MoHME), as the stewardship of health, is the key actor in the fight against COVID-19 in Iran. The Universities of Medical Sciences (UMS), the MoHME various deputies (particularly Deputies for Curative Affairs, Public Health, Nursing, and Administration and Finance), Food and Drug Organisation, Emergency Services Organisation, and Iran Health Insurance Organisation are the main intra-organisational actors within the MoHME, plus almost 200 Medical Associations, General Medical Council, General Nursing Council, Social Security Organisation (and other insurance organisations), are also among main actors in policymaking, implementation and evaluation of related policies. |

|                                        |                                        |                                                               |                                                                                                                                                                                                                                                                                           |                                                                                                                                                                                                     |
|----------------------------------------|----------------------------------------|---------------------------------------------------------------|-------------------------------------------------------------------------------------------------------------------------------------------------------------------------------------------------------------------------------------------------------------------------------------------|-----------------------------------------------------------------------------------------------------------------------------------------------------------------------------------------------------|
| Santos et al. 2021 (43)                | National, state, and federal district. | COVID-19                                                      | Not mentioned.                                                                                                                                                                                                                                                                            | Pandemic planners                                                                                                                                                                                   |
| Shimizu & Negita 2020 (49)             | National                               | COVID-19                                                      | Not mentioned.                                                                                                                                                                                                                                                                            | Ministry of Health, Labour, and Welfare and government                                                                                                                                              |
| Simões et al. 2020 (42)                | National                               | COVID-19                                                      | Not mentioned.                                                                                                                                                                                                                                                                            | Government and health system policy makers and practitioners                                                                                                                                        |
| Sohrabzadeh et al. 2021 (39)           | Health systems                         | Earthquake, flood, hurricane, tornado, or wildfire + COVID-19 | Not mentioned.                                                                                                                                                                                                                                                                            | Health system policy makers and practitioners                                                                                                                                                       |
| Wang et al. 2020 (80)                  | National                               | COVID-19                                                      | Not mentioned.                                                                                                                                                                                                                                                                            | Government and community                                                                                                                                                                            |
| Wang et al. 2020 (69)                  | National                               | COVID-19                                                      | Not mentioned.                                                                                                                                                                                                                                                                            | Health system policy makers and practitioners                                                                                                                                                       |
| Yang et al. 2021 (63)                  | National                               | COVID-19                                                      | Not mentioned.                                                                                                                                                                                                                                                                            | Government and health system policy makers and practitioners                                                                                                                                        |
| <b>MULTIMETHOD STUDIES</b>             |                                        |                                                               |                                                                                                                                                                                                                                                                                           |                                                                                                                                                                                                     |
| Kapiriri et al. 2021 (50)              | National                               | COVID-19                                                      | Not mentioned.                                                                                                                                                                                                                                                                            | Ministry of Health, health system policy makers and practitioners                                                                                                                                   |
| Hanvoravongchai et al. 2010 (23)       | Health systems                         | H1N1/2009                                                     | Preparedness is a complex phenomenon which involves many aspects, including disease surveillance, case management, command and control, and community containment.                                                                                                                        | Health system policy makers and practitioners                                                                                                                                                       |
| Seyedin et al. 2021 (96)               | National and hospital                  | COVID-19                                                      | Not mentioned.                                                                                                                                                                                                                                                                            | Ministry of Health and hospitals                                                                                                                                                                    |
| <b>OPINION STUDIES</b>                 |                                        |                                                               |                                                                                                                                                                                                                                                                                           |                                                                                                                                                                                                     |
| Al Nsour et al. 2020 (76)              | Regional and national                  | COVID-19                                                      | Not mentioned.                                                                                                                                                                                                                                                                            | Global Health Development (GHD)/ Eastern Mediterranean Public Health Network (EMPHNET)                                                                                                              |
| Ballard et al. 2020 (73)               | Community                              | COVID-19                                                      | Not mentioned.                                                                                                                                                                                                                                                                            | Ministries of Health, regional authorities, and communities.                                                                                                                                        |
| Costantino & Fiacchini 2020 (58)       | National                               | COVID-19                                                      | Not mentioned.                                                                                                                                                                                                                                                                            | The Working Group for Communication in Public Health of the Italian Society of Hygiene, Preventive Medicine and Public Health (the main Italian Scientific Society for Public Health professionals) |
| Gibson, Theodore. & Jellison 2012 (27) | National and community                 | Not specified†                                                | The capability of the public health and health care systems, communities, and individuals, to prevent, protect against, quickly respond to, and recover from health emergencies, particularly those whose scale, timing, or unpredictability threatens to overwhelm routine capabilities. | Public health agencies                                                                                                                                                                              |

|                                      |                            |                    |                                                                                                                                                                                                                                                                                                                                       |                                               |
|--------------------------------------|----------------------------|--------------------|---------------------------------------------------------------------------------------------------------------------------------------------------------------------------------------------------------------------------------------------------------------------------------------------------------------------------------------|-----------------------------------------------|
| Ippolito et al. 2020 (25)            | National and community     | COVID-19           | Preparedness should include upstream prevention through better collaboration of different sciences, to enhance capacity to identify potential pathogens before they become serious human threats, and to prevent their emergence where possible.                                                                                      | Health system policy makers and practitioners |
| Lee et al. 2020 (30)                 | National                   | COVID-19           | Not mentioned.                                                                                                                                                                                                                                                                                                                        | Government                                    |
| Subba et al. 2021 (40)               | Primary health care system | COVID-19           | Not mentioned.                                                                                                                                                                                                                                                                                                                        | Primary health care institutions (PHCIs)      |
| Wijesinghe et al. 2020 (35)          | Regional                   | Pandemic influenza | Not mentioned.                                                                                                                                                                                                                                                                                                                        | Member States and WHO                         |
| Grey literature                      |                            |                    |                                                                                                                                                                                                                                                                                                                                       |                                               |
| World Health Organization. 2018 (18) | Regional                   | EVD                | <b>Operational Readiness</b> includes being operationally ready to detect and respond to a potential importation of a new case. It takes place in a broader context of emergency preparedness and therefore also responds to the needs of countries to build sustainable capacities to manage outbreaks and other health emergencies. | Member States and WHO                         |

AHPPC, Australian Health Protection Principal Committee; CDNA, Communicable Disease Network of Australia; CID, Centre for Infectious Disease Control; COFECO, Federal Coordination Committee; COVID-19, Coronavirus Disease 2019; CPRC, Crisis Preparedness and Response Centre; DRC, Democratic Republic of the Congo; EMPHNET, Eastern Mediterranean Public Health Network; EVD, Ebola virus disease; GHD, Global Health Development; ICEG, Infection Control Expert Group; MERS, Middle East respiratory syndrome; MoHP, Ministry of Health and Population; MOHSW, Ministry of Health and Social Welfare; N/A, not applicable; NCCN, National Crisis Centre; NSC, National Security Council; NTF, National Task Force; PAHO, Pan American Health Organisation; PHCIs, primary health care institutions; PHEOC, Ministry of Health, Public Health Emergency Operations Centre; PHLN, Public Health Laboratory Network; PHSS, Public health services; RAG, Risk Assessment Group; RMG, Risk Management Group; SARS, severe acute respiratory syndrome; UMS, Universities of Medical Sciences; WHO, World Health Organisation.

**Note:** Information in the table above is verbatim from the respective documents.
